# Supplementary material
Source: PubMed Central journal article supplement (PMC2924044)
Supplement: supp_M109.095752_jbc.M109.095752-1.pdf [file supp_M109.095752_jbc.M109.095752-1.pdf]

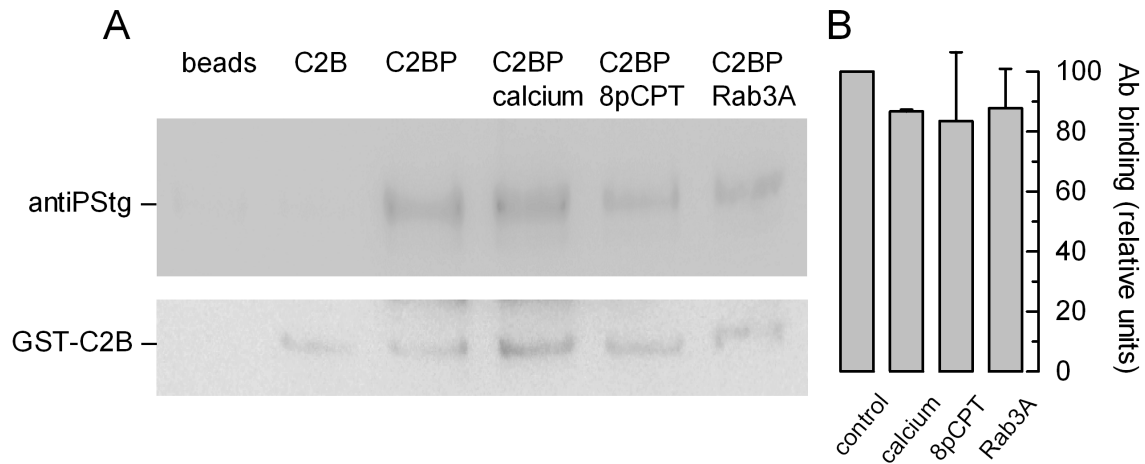

**Figure S1. The binding of the antiPSStg antibody to phosphorylated C2B synaptotagmin VI domain was not influenced by calcium.** (A) 0.5  $\mu$ M GST-C2B domain immobilized in glutathione-sepharose beads were phosphorylated as describe in experimental procedures using 100  $\mu$ M ATP. The beads loaded with phosphorylated C2B domain (C2BP) were washed with PBS and incubated for 1 h at 20°C in washing buffer (PBS, 0.2% Tween 20) supplemented with 5% BSA. The beads were washed twice with PBS and resuspended in sucrose buffer (250 mM sucrose, 0.5 mM EGTA, 20 mM Hepes-K, pH 7) and incubated with 2.5  $\mu$ M antiPSStg antibody for 30 min. at 37°C with no addition or in the presence of 10  $\mu$ M free calcium, 300 nM Rab3A, or 50  $\mu$ M 8pCPT. Beads were washing four times with 50 mM Hepes, 150 mM NaCl, pH 7. As a control, the C2BP beads were substituted by uncoated beads (beads) or by beads carrying the non phosphorylated C2B domain (C2B). Proteins were resolved in 12.5 % Tris-tricine SDS-PAGE and transferred to 0.22  $\mu$ m nitrocellulose membranes (Hybond, GE Healthcare). Non-specific reactivity was blocked by incubation for 2 h at room temperature with 5% skim milk dissolved in washing buffer. To detect antiPSStg bound to GST-C2BP, blots were incubated for 1h at 20°C with HRP-conjugated goat anti-rabbit-IgG (Jackson Immunochemicals Seroimmuno Diagnostics, Inc. Tucker, GA, 1:20000 in washing buffer containing 5% skim milk). To detect GST-C2B and GST-C2BP domains, blots were incubated for 1 h at 20°C with an anti synaptotagmin antibody that recognizes phosphorylated and non-phosphorylated proteins (1)(10 nM in washing buffer containing 5% skim milk) using the same secondary antibody. Detection was accomplished with a chemiluminescence system (Western Lightning, Perkin Elmer, Migliore Laclaustra, Buenos Aires, Argentina). The images of the bands were obtained using a Luminescent Image Analyzer LAS-4000 (Fujifilm). (B) The antiPSStg bound to C2BP domains from two experiments as shown in A were quantified, normalized for the C2BP content of the assays and referred to the binding observed in the sucrose buffer with no additions. Bars represent the mean  $\pm$  range.

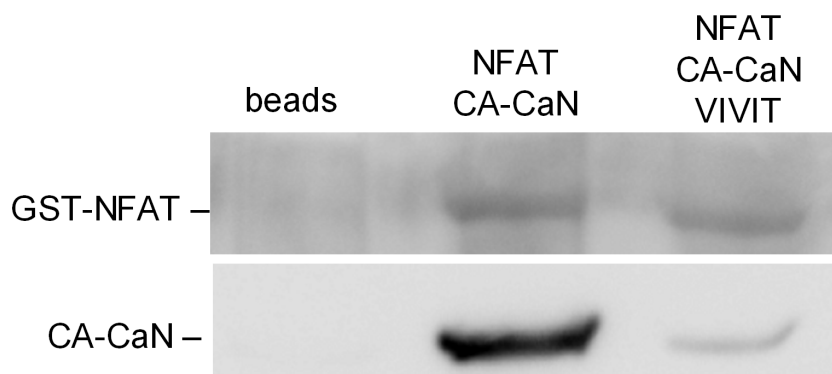

**Figure S2. CA-CaN binding to NFAT is blocked by VIVIT.** cDNA-encoding NFAT regulatory domain (residues 4-385) was generously provided by Dr. JM. Redondo (Centro Nacional de Investigaciones Cardiovasculares, Madrid, Spain). GST-NFAT was purified as describe (2). For the binding assay, 0.6  $\mu$ M GST-NFAT immobilized in glutathione-sepharose were washed with binding buffer (20 mM Tris, 100 mM NaCl, 6 mM MgCl<sub>2</sub>, 1  $\mu$ M DTT, 0.2% Triton X-100, pH 8, containing protease inhibitors) and then incubated with 90 nM CA-CaN in the presence or absence of 100  $\mu$ M VIVIT for 30 min at 4°C. After washing five times with binding buffer, proteins were resolved in 12.5 % Tris-tricine SDS-PAGE and transferred to 0.22  $\mu$ m nitrocellulose membranes (Hybond, GE Healthcare). Non-specific reactivity was blocked by incubation for 2 h at room temperature with 5% skim milk dissolved in washing buffer. To detect CA-CaN, blots were incubated with a home-made antiCA-CaN mouse antibody (1.3 nM in washing buffer/5% skim milk for 1h at RT). HRP-conjugated goat anti-mouse IgG (Kierkegaard & Perry Laboratories Inc., Gaithersburg, MD) was used as secondary antibody (0.25  $\mu$ g/ml, in washing buffer/5% skim milk, 1 h at 20°C). Finally to detect NFAT, blot were incubated with antiGST antibody (Chemicon Australia Pty. Ltd, Victoria, Australia, 0.16 nM in washing buffer/5% skim milk for 1h at RT) using HRP-conjugated goat anti-rabbit IgG as secondary antibody. Detection was accomplished as described in Figure S1

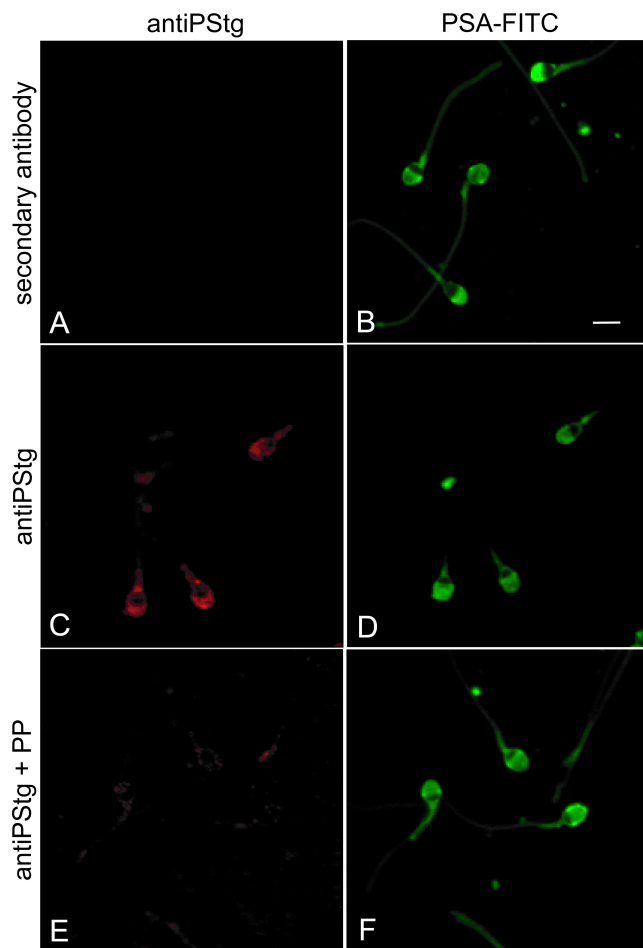

**Figure S3: Specificity of the antiPStg labeling.** Sperm were fixed and stained with antiPStg antibody (left panels) and PSA-FITC (right panels). In panels A and B, sperm were incubated with secondary antibody without antiPStg. In panels C and D, the antiPStg antibody was used at 135 nM. In panels E and F antiPStg was preincubated with an excess of phosphorylated peptide (PP, 1.35  $\mu$ M).

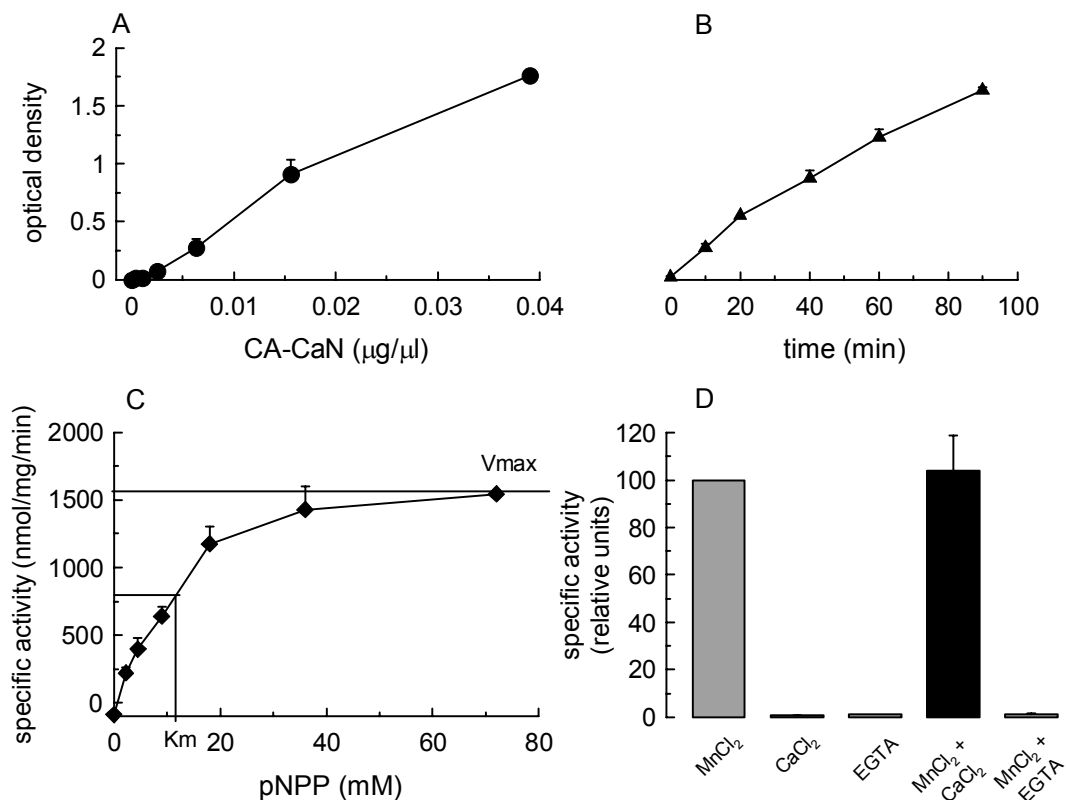

**Figure S4. Phosphatase properties of recombinant CA-CaN.** (A) Increasing concentrations of recombinant Ca-CaN were mixed in 45  $\mu\text{l}$  phosphatase buffer (20 mM p-nitrophenylphosphate, 50 mM Tris-HCl, 0.1 mg/ml BSA, 1 mM DTT, 1 mM MnCl<sub>2</sub>, pH 7.4) for 1 h at 30°C. The reaction was stopped with 450  $\mu\text{l}$  0.5 M Na<sub>2</sub>CO<sub>3</sub> and optical density was measured at 405 nm in a BIO-RAD microplate reader. (B) A reaction mix containing 0.015  $\mu\text{g}/\mu\text{l}$  CA-CaN was stopped at different times and optical density was measured. (C) Reaction mixes containing 0.015  $\mu\text{g}/\mu\text{l}$  CA-CaN and increasing concentrations of pNPP were incubated for 1 h at 30°C and the optical density was measured. Specific activity was estimated considering a 18300 p-nitrophenol molar extinction coefficient ( $\text{OD}\cdot\text{cm}^{-1}\cdot\text{M}^{-1}$ ). (D) Reaction mixes containing 0.015  $\mu\text{g}/\mu\text{l}$  CA-CaN and 1 mM MnCl<sub>2</sub>, or 1 mM CaCl<sub>2</sub>, or 1 mM EGTA, or 1 mM MnCl<sub>2</sub> + 1 mM CaCl<sub>2</sub>, or 1 mM MnCl<sub>2</sub> + 1 mM EGTA were incubated for 1 h at 30°C and the optical density was measured. Data represent the mean and s.e.m. of at least 3 independent experiments.

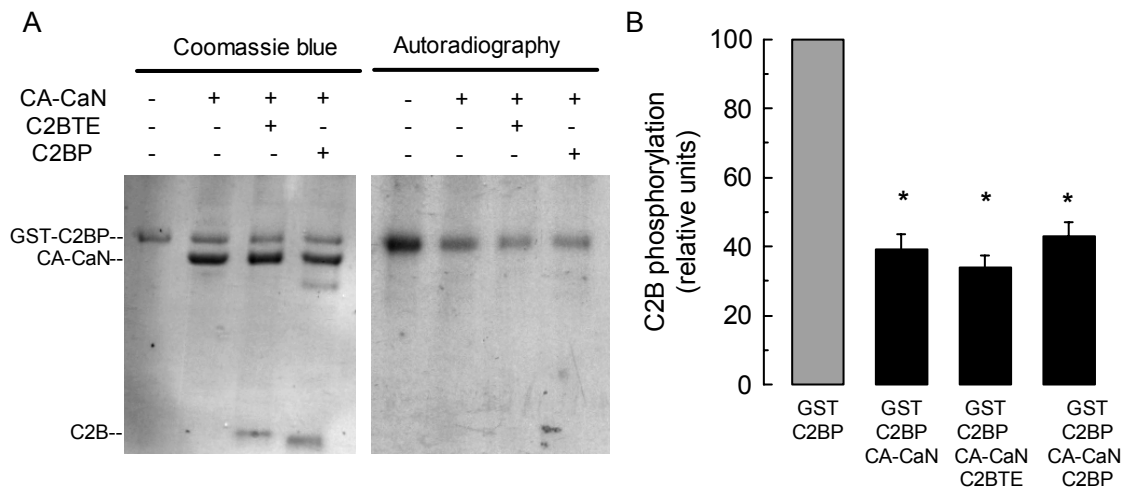

**Figure S5. Recombinant proteins do not prevent synaptotagmin C2B domain dephosphorylation.** (A) 1.8  $\mu$ M GST-C2B domains immobilized in glutathion beads were incubated for 40 min at 37°C with PKC $\beta$ II under activating conditions in the presence of [ $\gamma$ <sup>32</sup>P]ATP. The beads were washed and then incubated for 1h at 30°C in the presence or absence of 1.8  $\mu$ M constitutively CA-CaN, 3.6  $\mu$ M C2BTE, and 1.8  $\mu$ M cold phosphorylated C2B. Samples were then resolved by SDS-PAGE. Total proteins (left panels) are shown by coomassie blue stain. Phosphorylated proteins were detected by autoradiography (right panels). (B) Autoradiographies from three experiments as shown in A were quantified and normalized for the protein load. Data represent mean  $\pm$  s.e.m of 3 independent experiments. Asterisks indicate significant differences from the untreated control (one way ANOVA and 95% confidence interval for each condition).

#### Reference List

1. Roggero, C. M., Tomes, C. N., De Blas, G. A., Castillo, J., Michaut, M. A., Fukuda, M., and Mayorga, L. S. (2005) *Develop. Biol.* **285**, 422-435
2. Rodriguez, A., Martinez-Martinez, S., Lopez-Maderuelo, M. D., Ortega-Perez, I., and Redondo, J. M. (2005) *J. Biol. Chem.* **280**, 9980-9984
